# Supplementary material for: A Simple 3D Cell Culture Method for Studying the Interactions between Human Mesenchymal Stromal/Stem Cells and Patients Derived Glioblastoma
Source: MDPI journal article supplement (doi:10.3390/cancers15041304), 2023-02-18
Supplement: s1 [file s1]

| <b>GBM</b> | <b>Type</b> | <b>Morphology</b> | <b>Subtype</b> | <b>Treatment</b> | <b>Survival</b> |
|------------|-------------|-------------------|----------------|------------------|-----------------|
| GBMA1      | GBM IV      | neurospheres      | mesenchymal    | Stupp            | unknown         |
| GBM3       | GBM IV      | adherent          | proneural      | Stupp            | 13 m            |
| GBM8       | GBM IV      | neurospheres      | classical      | Stupp            | 18 m            |
| GBM22      | GBM IV      | neurospheres      | mesenchymal    | Stupp            | 15 m            |
| GBM69      | GBM IV      | neurospheres      | classical      | Stupp            | 17 m            |

**Table S1: list of patients derived GBM used in this study with morphological and subtypes.**

For all patients, surgery was followed by combined chem and radiotherapies (Stupp et al.Lancet Oncol. 2009;10(5):459-66. doi: 10.1016/S1470-2045(09)70025-7). Patients survival was within the normal range observed with GBM.

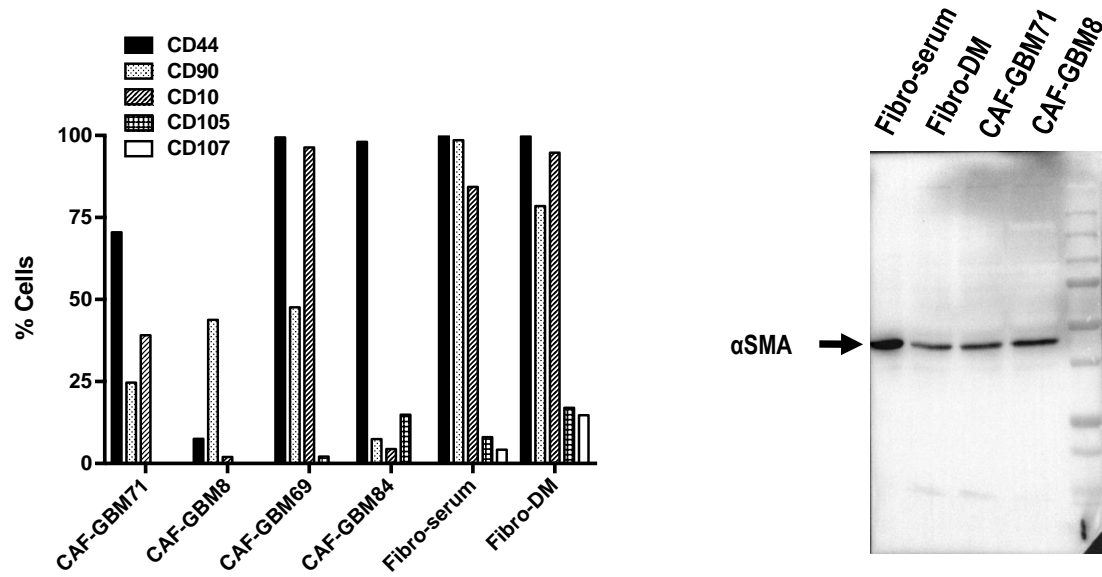

**Figure suppl. S1:**

FACS analyses of the different CAF populations prepared with different primary culture conditioned media versus fibroblasts using antibodies directed against CD44, CD90, CD10, CD105 and CD107 (markers used to characterized fibroblasts) and showed marked differences in the expression of these markers between the different CAFs tested (left) while all the different CAF populations expressed  $\alpha$ SMA (right)

GBMXX: patients derived primary cultures.

Fibro-serum: fibroblasts cultured in fetal calf serum.

Fibro-DM: fibroblasts cultured in defined medium.

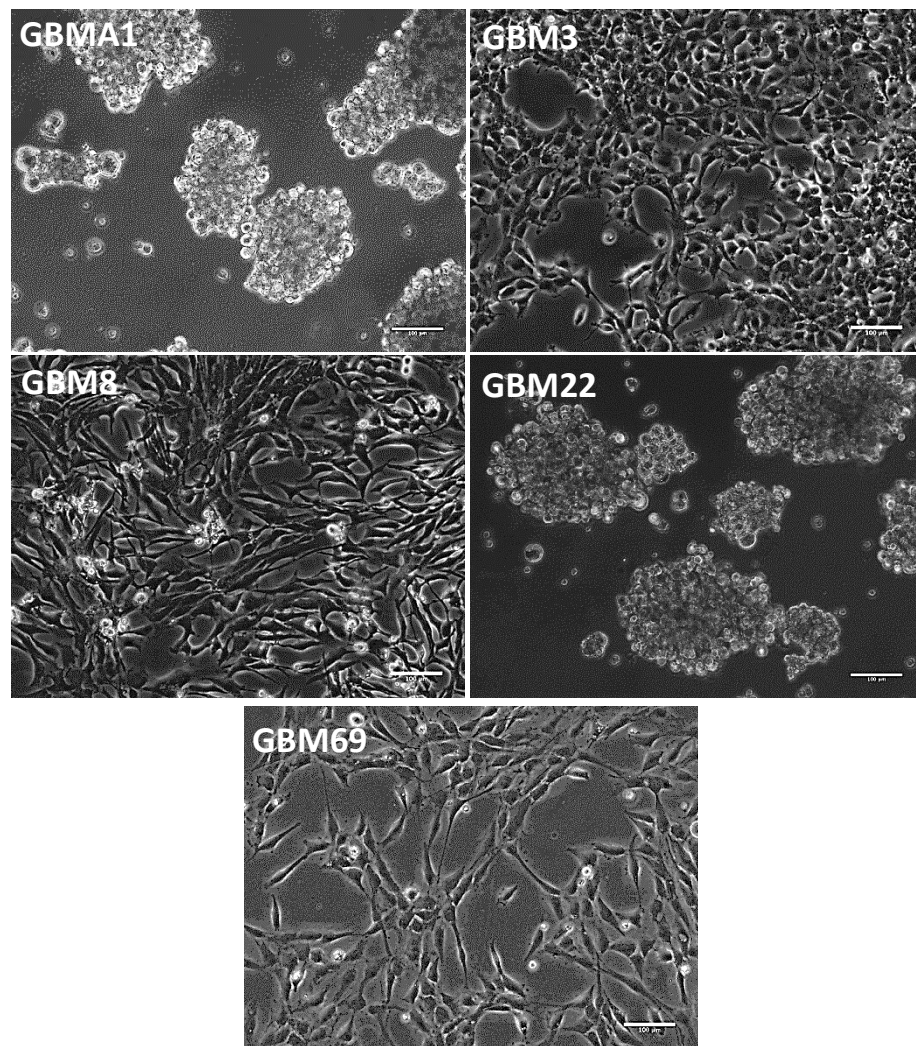

**Figure Suppl S2:**

Cellular networks of GBM grown under 2D conditions which are more diverse and when spheroids are formed less compact
